# Supplementary material
Source: publisher site journal article supplement (https://www.dovepress.com/get_supplementary_file.php?f=221980.docx)
Supplement: Supplementary file 1 [file get_supplementary_file.php]

**Supplementary material**

**Supplementary methods and results**

***DCE attributes and levels development***

The discrete choice experiment (DCE) was developed using a targeted literature review and qualitative research. Qualitative interviews1 and focus groups amongst patients with symptomatic chronic obstructive pulmonary disease (COPD) were conducted in the United Kingdom (UK), United States of America (USA), and Germany to identify preferences, priorities, and treatment goals and to determine the key relevant attributes of COPD treatment.

Interviews were conducted with respiratory clinicians in each country (n=1 per country). During the interviews, the following aspects were discussed concerning the patient experience of COPD: current treatment, patient satisfaction, ideal treatment attributes, and cost implications of treatment. Additionally, qualitative concept elicitation telephone interviews (n=10 per country) and in-person focus groups (n=1 per country with five patients taking part in the UK focus group and six patients each in the Germany and USA focus groups) were conducted in patients with COPD to explore treatment effectiveness, symptoms, health-related quality of life, and other features considered important to their treatment.

The qualitative research revealed that individuals with COPD demonstrate preferences for a number of attributes of medication, highlighting, in particular, the multifaceted nature of treatment effectiveness and the overall importance of the delivery device. Using the qualitative data, we identified six important attributes of COPD treatment for inclusion in the DCE, assigning the most appropriate number and range of levels for each of these [Schroeder et al, 2019; manuscript in development].

***DCE testing and pilot survey***

The pilot survey included 12 choice sets for the UK, 18 choice sets for the USA, and 14 choice sets for Germany. Differences in choice set number were due to the draft design, whereby the UK used a separate design due to the omission of cost as an attribute, and the USA survey included several dominant choice sets that were removed before starting the German pilot survey. Potential participants completed study screening questions. Telephone interviews (lasting ≤60 mins) were then conducted by experienced, trained interviewers, according to an institutional review board (IRB) approved cognitive interview guide. Interviewer notes were entered into an analysis grid and reviewed for any revisions or amendments required to the DCE to improve attribute saliency and participant comprehension.

***Pilot survey data analysis***

Pilot data were reviewed to ensure that the survey and software were running correctly and that the data were logical. This included dominance checks and consistency checks, in which one randomly selected choice set was repeated to check for consistency in responses. In addition, the time to complete the survey was assessed and short or long response times reviewed as a possible indicator of participants not understanding the questions and randomly selecting options.

Preliminary statistical analysis of results was conducted using conditional logit and mixed-effects logit. Conditional logit relates the probability of choice among two or more alternatives to the characteristics of the attribute levels defining those alternatives. In a DCE, the elements describing the alternatives are the attribute levels used to define each profile in the choice task. Conditional logit was shown to be consistent with random utility theory.2 Mixed-effects logit is a hierarchical modelling approach that accommodates correlations due to individuals’ multiple choices through random effects. These methods have been described and recommended for DCEs by an International Society for Pharmacoeconomics and Outcomes Research (ISPOR) Task Force.3

***Final DCE data analysis***

The marginal rate of substitution (MRS) was calculated using a multinomial logit model, where X and Y are attributes and d represents the change in attribute Y with respect to attribute X:

The MRS was calculated using the continuous attributes of out-of-pocket costs (USA and Germany only) and the number of exacerbations as the denominators. Dummy coding was used for all variables.

***Pilot survey results***

Based on findings from the qualitative analysis, the pilot DCE survey tested preferences for hypothetical treatments characterized by the attributes and levels shown in Table S4. In the USA, some initial changes to the design of the choice sets were made after the first six responses were completed. These changes, which were made to include only one dominant choice set and one consistency test, were also applied to surveys in the UK and Germany. The surveys were piloted in 20 participants in the UK, 14 in the US, and 20 in Germany. Participant demographics, clinical characteristics, and treatment history are provided in Tables S1 and S2. In the dominance checks, all participants chose the expected response to the dominant choice sets (Table S3).

For consistency checks, each survey included two questions; selecting a hypothetical option (A vs B), and preference for the hypothetical choice vs their current medication. The majority of individuals provided consistent responses to both repeated questions (Table S3). Time to complete the survey was generally aligned with expectation, with the exception of maximum time in the USA (Table S3). The completion time was also summarized in the subset of individuals who showed inconsistencies in their responses to the repeated choice set (data not shown); completion time for the subset and the overall sample was qualitatively compared and no differences were observed. For all countries, considering all choice sets together, the current treatment was more often preferred over the hypothetical treatment (Table S3). Results for the mixed-effects logit showed that, across all attributes, odds ratios (ORs) were <1 showing that for a worsening in the attribute level (eg, from ‘some’ to ‘a lot’ of side effects), there was a reduced likelihood of participants preferring the treatment. Of note, for the USA and Germany, the cost results were not as expected; the attribute is for decreasing costs, so a positive relationship would be expected. Also, the UK results were generally implausible across all attributes, whereby ORs (0.00–0.19) indicated that for each one-unit increase in the levels (eg, increased medication frequency/number of inhalers), the likelihood of participants preferring the treatment was reduced by 81–100%, depending on the attribute. Thus, sufficient data were not available at the pilot stage to estimate random effects robustly. For the conditional logit model, ORs were again <1 across all attributes except cost, indicating that for a worsening in the attribute level, there was a reduced likelihood of participants preferring the treatment. Results were generally in line with expectations and similar across countries.

Following completion of the pilot DCE survey, the choice set experimental design was further refined. The final survey comprised 18 choice sets with the following design features: randomization of presentation of the choice sets; one choice set that was an ‘obvious choice’ as a ‘dominance check’; and one repeat choice set as a ‘consistency check’.

***DCE results***

**Preference heterogeneity**

Participants in the UK and Germany who had experienced more exacerbations did not assign as much positive value to experiencing <2 exacerbations in the next year compared with participants who had experienced fewer exacerbations (Table S8). With each additional exacerbation that participants had experienced, the preference estimate for a reduction in exacerbations decreased by 0.12 and 0.09 (*p*=0.0002 and *p*=0.0043) for the UK and Germany, respectively, while the USA showed no difference (–0.03; *p*=0.3923).

Participants in Germany who used a dry-powder inhaler (DPI) and a soft-mist inhaler (SMI) in combination assigned less positive value to no mistakes (vs a lot of mistakes), compared with participants who used a DPI alone. The coefficient for making no mistakes decreased by 0.32 if a participant used a DPI and SMI in combination (*p*=0.0288). German participants who used a SMI alone also assigned more value to ease of use than participants who used a DPI alone. The coefficient for making some mistakes increased by 0.56 if a participant used a SMI as part of combination therapy (*p*=0.0345). Comparatively, UK participants who used a combination of a DPI and SMI valued no mistakes more positively than participants who used only a DPI. The preference estimate for no mistakes increased by 0.37 (*p*=0.0268) when a participant used a DPI and SMI instead of a DPI only. Overall, no consistent relationship between current inhaler use and the ease of inhaler use attribute was identified for UK participants. In the USA, participants who used a DPI, SMI, and pressurized metered dose inhaler (pMDI) in combination did not assign as much value to ease of inhaler use as participants who used a DPI alone. The coefficient for no mistakes reduced by 0.56 (*p*=0.0111) and the coefficient for some mistakes reduced by 0.50 (*p*=0.0265) if a participant used a DPI, SMI, and pMDI instead of a DPI alone. Participants on three types of inhalers (DPI, SMI, and pMDI) assigned less value to the number of inhalers that were used.

There was a lack of interaction between the current number of inhalers and the number of inhalers attribute across all countries, with preference estimates of –0.08, 0.02, and –0.02 for the UK, USA, and Germany, respectively (*p*-values of 0.0997, 0.7501, and 0.6168, respectively). Finally, treatment preferences for the ease of inhaler use attribute did not differ based on age; no significant interaction was found between participants’ age and the ease of inhaler use attribute in the UK, USA, or Germany.

**Supplementary tables**

**Table S1** Demographics and clinical characteristics of participants in the pilot discrete choice experiment (DCE)

|  | **Total**  **(N=54)** | **UK**  **(n=20)** | **USA**  **(n=14)** | **Germany**  **(n=20)** |
| --- | --- | --- | --- | --- |
| **Age, years** |  |  |  |  |
| Mean (SD) | 63.3 (6.7) | 64.1 (7.0) | 66.7 (5.4) | 60.5 (5.6) |
| **Sex, n (%)** |  |  |  |  |
| Male | 34 (63.0) | 11 (55.0) | 8 (57.1) | 15 (75.0) |
| Female | 20 (37.0) | 9 (45.0) | 6 (42.9) | 5 (25.0) |
| **Ethnicity, n (%)** |  |  |  |  |
| German | 17 (31.5) | N/A | N/A | 17 (85.0) |
| White British | 20 (37.0) | 20 (100.0) | N/A | N/A |
| White or Caucasian | 17 (31.5) | 0 (0) | 14 (100.0) | 3 (15.0) |
| **Employment, n (%)** |  |  |  |  |
| Employed full-time | 6 (11.1) | 3 (15.0) | 0 (0) | 3 (15.0) |
| Employed part-time | 5 (9.3) | 2 (10.0) | 0 (0) | 3 (15.0) |
| Self-employed | 2 (3.7) | 0 (0) | 1 (7.1) | 1 (5.0) |
| Seeking work | 1 (1.9) | 0 (0) | 0 (0) | 1 (5.0) |
| Retired | 30 (55.6) | 10 (50) | 13 (92.9) | 7 (35.0) |
| Stay-at-home | 3 (5.6) | 1 (5) | 0 (0) | 2 (10.0) |
| Unemployed | 2 (3.7) | 1 (5) | 0 (0) | 1 (5.0) |
| Student | 0 (0) | 0 (0) | 0 (0) | 0 (0) |
| Other | 5 (9.3) | 3 (15) | 0 (0) | 2 (10.0) |
| **Marital status, n (%)** |  |  |  |  |
| Married | 25 (46.3) | 6 (30.0) | 10 (71.4) | 9 (45.0) |
| Divorced/separated | 13 (24.1) | 8 (40.0) | 2 (14.3) | 3 (15.0) |
| Partnership | 6 (11.1) | 2 (10.0) | 0 (0) | 4 (20.0) |
| Widowed | 5 (9.3) | 2 (10.0) | 2 (14.3) | 1 (5.0) |
| Single | 5 (9.3) | 2 (10.0) | 0 (0) | 3 (15.0) |
| **Smoking status, n (%)** |  |  |  |  |
| Former | 26 (48.1) | 11 (55.0) | 9 (64.3) | 6 (30.0) |
| Current | 24 (44.4) | 8 (40.0) | 4 (28.6) | 12 (60.0) |
| Never | 4 (7.4) | 1 (5.0) | 1 (7.1) | 2 (10.0) |
| **Pet ownership, n (%)** |  |  |  |  |
| Current | 22 (40.0) | 8 (40.0) | 5 (35.7) | 9 (45.0) |
| Former | 21 (40.0) | 9 (45.0) | 7 (50.0) | 5 (25.0) |
| Never | 11 (20.0) | 3 (15.0) | 2 (14.3) | 6 (30.0) |
| **CAT score** |  |  |  |  |
| Mean (SD) | 22.3 (6.9) | 22.8 (7.8) | 20.9 (4.7) | 22.8 (7.4) |
| **Exacerbations in the past year, n (%)** |  |  |  |  |
| 0 | 0 (0) | 0 (0) | 0 (0) | 0 (0) |
| 1 | 22 (40.7) | 6 (30.0) | 8 (57.0) | 8 (40.0) |
| 2 | 17 (31.5) | 6 (30.0) | 4 (29.0) | 7 (35.0) |
| ≥3 | 15 (27.8) | 8 (40.0) | 2 (14.0) | 5 (25.0) |

**Abbreviations:** CAT, COPD Assessment Test; DCE, discrete choice experiment; N/A, not applicable; SD, standard deviation; UK, United Kingdom; USA, United States of America.

**Table S2** Treatment history of participants in the pilot discrete choice experiment (DCE)

|  | **Total**  **(N=54)** | **UK**  **(n=20)** | **USA**  **(n=14)** | **Germany**  **(n=20)** |
| --- | --- | --- | --- | --- |
| **Maintenance treatment, n (%)** |  |  |  |  |
| ICS/LABA | 30 (56) | 16 (80) | 10 (71) | 4 (20) |
| LAMA/LABA | 15 (28) | 2 (10) | 4 (29) | 9 (45) |
| LABA | 2 (4) | 0 (0) | 0 (0) | 2 (10) |
| LAMA | 30 (56) | 15 (75) | 6 (43) | 9 (45) |
| ICS | 0 (0) | 0 (0) | 0 (0) | 0 (0) |
| SABA | 0 (0) | 0 (0) | 0 (0) | 0 (0) |
| ICS/LAMA/LABA | 0 (0) | 0 (0) | 0 (0) | 0 (0) |
| **Time on maintenance treatment, years** |  |  |  |  |
| Median (IQR) | 2.50 (1.1–4.8) | 2.0 (1.5–4.8) | 3.0 (2.0–4.8) | 2.8 (1.0–3.8) |
| **Rescue medication, n (%)a** |  |  |  |  |
| Not receiving rescue medication | 13 (24) | 2 (10) | 5 (36) | 6 (30) |
| Albuterol sulfate/albuterol sulfate HFA | 6 (11) | 0 (0) | 6 (43) | 0 (0) |
| Bricanyl | 2 (4) | 1 (5) | 0 (0) | 1 (5) |
| Fenoterol hydrobromide | 1 (2) | 0 (0) | 0 (0) | 1 (5) |
| Fluticasone propionate/salmeterol | 1 (2) | 0 (0) | 0 (0) | 1 (5) |
| Formoterol fumarate dihydrate | 1 (2) | 0 (0) | 0 (0) | 1 (5) |
| Ipratropium bromide | 1 (2) | 0 (0) | 0 (0) | 1 (5) |
| Oxis turbohaler | 0 (0) | 0 (0) | 0 (0) | 0 (0) |
| Salbutamol | 15 (28) | 5 (25) | 1 (7) | 9 (45) |
| Terbutaline | 0 (0) | 0 (0) | 0 (0) | 0 (0) |
| Ventolin HFA | 14 (26) | 12 (60) | 2 (14) | 0 (0) |
| **Time on rescue medication, years** |  |  |  |  |
| Median (IQR) | 3.0 (2.0–6.0) | 4.5 (3.0–8.0) | 3.0 (2.0–5.0) | 2.5 (1.3–5.0) |
| **Current monthly cost of COPD medicationb** |  |  |  |  |
| Median (IQR) | 15.0 (6.00–45.00) | N/A | 47.5 (35.50–91.25) | 10.0 (5.00–12.75) |

**Notes:** aIn some cases, both the brand name and the generic name were referenced to increase familiarity to patients and improve the accuracy of patient reporting. Patients were only able to select one option from this list, so could not report both the brand name and the generic name: data are mutually exclusive. bGermany: Euros; USA: US dollars.

**Abbreviations:** COPD, chronic obstructive pulmonary disease; DCE, discrete choice experiment; HFA, hydrofluoroalkane; ICS, inhaled corticosteroid; IQR, interquartile range; LABA, long-acting β2-agonist; LAMA, long-acting muscarinic antagonist; N/A, not applicable; SABA, short-acting β2-agonist; UK, United Kingdom; USA, United States of America.

**Table S3** Pilot discrete choice experiment (DCE) survey results

|  | **UK**  **(n=20)** | **USA**  **(n=14)** | **Germany**  **(n=20)** |
| --- | --- | --- | --- |
| **Dominance check, n (%)** | 20 (100.0) | 14 (100.0) | 20 (100.0) |
| **Consistency check, n (%)** |  |  |  |
| A vs B selection | 16 (80.0) | 12 (85.7) | 14 (70.0) |
| Preference for hypothetical treatment over current therapy | 14 (70.0) | 11 (78.6) | 17 (85.0) |
| **Time required to complete survey, mins** |  |  |  |
| Minimum | 8 | 11 | 13 |
| Median | 18.5 | 17.5 | 21 |
| Maximum | 57 | 154 | 51 |
| **Preference for hypothetical treatment over current therapy, n (%)** | 104 (40.0) | 53 (25.2) | 110 (36.7) |
| **Mixed-effect logit, OR (95% CI)** |  |  |  |
| Ease of use (per one unit increase in level)a | 0.19 (0.02–2.24) | 0.60 (0.38–0.96) | 0.60 (0.42–0.85) |
| Exacerbations (per one exacerbation increase/year) | 0.00 (0.00–0.28) | 0.56 (0.32–0.96) | 0.31 (0.18–0.54) |
| Medication frequency (per one increase/day) | 0.15 (0.01–1.89) | 0.56 (0.34–0.94) | 0.52 (0.33–0.83) |
| Maintenance/prevention inhalers (per one inhaler increase) | 0.11 (0.02–0.56) | 0.52 (0.33–0.83) | 0.41 (0.27–0.61) |
| Out-of-pocket costs (per 5% decrease)b | N/A | 0.86 (0.50–1.45) | 1.00 (0.62–1.61) |
| Side effects (per one unit increase in level)c | 0.00 (0.00–0.13) | 0.16 (0.06–0.40) | 0.30 (0.16–0.59) |
| **Conditional logit, OR (95% CI)** |  |  |  |
| Ease of use (per one unit increase in level)a | 0.65 (0.47–0.90) | 0.70 (0.57–0.85) | 0.74 (0.63–0.86) |
| Exacerbations (per one exacerbation increase/year) | 0.49 (0.38–0.63) | 0.75 (0.59–0.95) | 0.58 (0.48–0.70) |
| Medication frequency (per one increase/day) | 0.72 (0.53–0.97) | 0.65 (0.49–0.87) | 0.63 (0.50–0.79) |
| Maintenance/prevention inhalers (per one inhaler increase | 0.72 (0.57–0.89) | 0.58 (0.45–0.73) | 0.54 (0.45–0.66) |
| Out-of-pocket costs (per 5% decrease)b | N/A | 1.09 (0.82–1.45) | 1.20 (0.95–1.50) |
| Side effects (per one unit increase in level)c | 0.24 (0.16–0.37) | 0.32 (0.22–0.46) | 0.40 (0.30–0.54) |

**Notes:** In the pilot study, the ‘best’ level logically was used as reference. a0: no mistakes; 1: some mistakes; 2: a lot of mistakes; b Cost reduction relative to cost of current medication; c0: no side effects; 1: some side effects; 2: a lot of side effects.

**Abbreviations:** CI, confidence interval; DCE, discrete choice experiment; N/A, not applicable; OR, odds ratio; UK, United Kingdom; USA, United States of America.

**Table S4** Final discrete choice experiment (DCE) design constructed in Ngene4

| **Choice set** | **Option** | **Attribute levels** | | | | | | **Logic test** |
| --- | --- | --- | --- | --- | --- | --- | --- | --- |
|  |  | Ease of usea | Exacer-bationsb | Number of times/dayc | Number of inhalersd | Out-of-pocket costse | Side effectsf | Dominant choice setg |
| 1 | A | 2 | 1 | 1 | 2 | 0.1 | 0 | 0 |
| 1 | B | 0 | 2 | 3 | 3 | 0.05 | 1 | 0 |
| 2 | A | 2 | 0 | 2 | 3 | 0.05 | 0 | 0 |
| 2 | B | 1 | 1 | 1 | 1 | 0.1 | 1 | 0 |
| 3 | A | 0 | 2 | 1 | 2 | 0 | 1 | 0 |
| 3 | B | 1 | 0 | 2 | 1 | 0.1 | 0 | 0 |
| 4 | A | 2 | 0 | 3 | 1 | 0.1 | 1 | 0 |
| 4 | B | 1 | 1 | 2 | 3 | 0.05 | 2 | 0 |
| 5 | A | 1 | 2 | 3 | 1 | 0.05 | 1 | 0 |
| 5 | B | 0 | 0 | 1 | 2 | 0 | 2 | 0 |
| 6 | A | 1 | 0 | 1 | 3 | 0 | 0 | 0 |
| 6 | B | 2 | 1 | 2 | 2 | 0.1 | 2 | 0 |
| 7 | A | 1 | 2 | 3 | 3 | 0 | 2 | 1 |
| 7 | B | 0 | 1 | 2 | 2 | 0.05 | 1 | 1 |
| 8 | A | 1 | 0 | 1 | 1 | 0.05 | 2 | 0 |
| 8 | B | 0 | 2 | 3 | 3 | 0.1 | 0 | 0 |
| 9 | A | 0 | 1 | 1 | 3 | 0.05 | 1 | 0 |
| 9 | B | 2 | 2 | 2 | 2 | 0 | 0 | 0 |
| 10 | A | 0 | 1 | 2 | 1 | 0.1 | 2 | 0 |
| 10 | B | 1 | 2 | 1 | 2 | 0.05 | 1 | 0 |
| 11 | A | 0 | 2 | 2 | 2 | 0.1 | 0 | 0 |
| 11 | B | 2 | 1 | 3 | 3 | 0 | 2 | 0 |
| 12 | A | 2 | 0 | 3 | 2 | 0.05 | 2 | 0 |
| 12 | B | 0 | 2 | 1 | 1 | 0 | 0 | 0 |
| 13 | A | 2 | 2 | 1 | 1 | 0.05 | 2 | 0 |
| 13 | B | 1 | 0 | 3 | 2 | 0 | 1 | 0 |
| 14 | A | 2 | 1 | 2 | 3 | 0 | 1 | 0 |
| 14 | B | 0 | 0 | 3 | 1 | 0.05 | 2 | 0 |
| 15 | A | 0 | 1 | 3 | 1 | 0 | 0 | 0 |
| 15 | B | 1 | 2 | 1 | 3 | 0.1 | 2 | 0 |
| 16 | A | 0 | 0 | 2 | 3 | 0.1 | 1 | 0 |
| 16 | B | 2 | 1 | 3 | 1 | 0.05 | 0 | 0 |
| 17 | A | 1 | 2 | 2 | 2 | 0 | 2 | 0 |
| 17 | B | 2 | 0 | 1 | 3 | 0.1 | 0 | 0 |
| 18 | A | 1 | 1 | 3 | 2 | 0.1 | 0 | 0 |
| 18 | B | 2 | 0 | 2 | 1 | 0 | 1 | 0 |

**Notes:** a0: likely to make no mistakes; 1: likely to make some mistakes; 2: likely to make a lot of mistakes; b0: likely to experience no exacerbations (flare-ups) in the next year; 1: likely to experience one exacerbation (flare-up) in the next year; 2: likely to experience two exacerbations (flare-ups) in the next year; c1: once a day; 2: twice a day; 3: three times a day; d1: one inhaler; 2: two different inhalers; 3: three different inhalers; e0: no change in cost of medication; 0.05: 5% decrease in cost of medication; 0.1: 10% decrease in cost of medication (cost reduction relative to cost of current medication [USA and Germany only]); f0: likely to experience no side effects; 1: likely to experience some side effects; 2: likely to experience a lot of side effects; g0: no dominant choice set; 1: choice set with a dominant choice.

**Abbreviations:** DCE, discrete choice experiment; USA, United States of America.

**Table S5** Baseline characteristics in the final discrete choice experiment (DCE)

|  | **Total**  **(N=450)** | **UK**  **(n=150)** | **USA**  **(n=150)** | **Germany**  **(n=150)** |
| --- | --- | --- | --- | --- |
| **Ethnicity, n (%)** |  |  |  |  |
| German | 129 (28.7) | N/A | N/A | 129 (86.0) |
| White British | 145 (32.2) | 145 (96.7) | N/A | N/A |
| White or Caucasian | 164 (36.4) | 0 (0) | 143 (95.3) | 21 (14.0) |
| Any other white background | 4 (0.9) | 4 (2.7) | 0 (0) | 0 (0) |
| Caribbean | 1 (0.2) | 1 (0.7) | 0 (0) | 0 (0) |
| Black or African American | 4 (0.9) | 0 (0) | 4 (2.7) | 0 (0) |
| Asian | 2 (0.4) | 0 (0) | 2 (1.3) | 0 (0) |
| American Indian or Alaska Native | 1 (0.2) | N/A | 1 (0.7) | N/A |
| **Employment, n (%)** |  |  |  |  |
| Employed full-time | 68 (15.1) | 11 (7.3) | 21 (14.0) | 36 (24.0) |
| Employed part-time | 37 (8.2) | 13 (8.7) | 6 (6.7) | 14 (9.3) |
| Self-employed | 17 (3.8) | 4 (2.7) | 7 (4.7) | 6 (4.0) |
| Seeking work | 5 (1.1) | 1 (0.7) | 2 (1.3) | 2 (1.3) |
| Retired | 248 (55.1) | 85 (56.7) | 91 (60.7) | 72 (48.0) |
| Stay-at-home | 40 (8.9) | 18 (12.0) | 9 (6.0) | 13 (8.7) |
| Unemployed | 20 (4.4) | 13 (8.7) | 3 (2.0) | 4 (2.7) |
| Student | 2 (0.4) | 2 (1.3) | 0 (0) | 0 (0) |
| Other | 13 (2.9) | 3 (2.0) | 7 (4.7) | 3 (2.0) |
| **Marital status, n (%)** |  |  |  |  |
| Married | 215 (47.8) | 68 (45.3) | 79 (52.7) | 68 (45.3) |
| Divorced/separated | 114 (25.3) | 40 (26.7) | 39 (26.0) | 35 (23.3) |
| Partnership | 41 (9.1) | 11 (7.3) | 10 (6.7) | 20 (13.3) |
| Widowed | 41 (9.1) | 17 (11.3) | 14 (9.3) | 10 (6.7) |
| Single | 39 (8.7) | 14 (9.3) | 8 (5.3) | 17 (11.3) |
| **Pet ownership, n (%)** |  |  |  |  |
| Current | 226 (50.2) | 62 (41.3) | 98 (65.3) | 66 (44.0) |
| Former | 143 (31.8) | 56 (37.3) | 39 (26.0) | 48 (32.0) |
| Never | 81 (18.0) | 32 (21.3) | 13 (8.7) | 36 (24.0) |

**Abbreviations:** DCE, discrete choice experiment; N/A, not applicable; UK, United Kingdom; USA, United States of America.

**Table S6** Treatment history of participants in the final discrete choice experiment (DCE)

|  | **Total**  **(N=450)** | **UK**  **(n=150)** | **USA**  **(n=150)** | **Germany**  **(n=150)** |
| --- | --- | --- | --- | --- |
| **Maintenance treatment, n (%)** |  |  |  |  |
| ICS/LABA | 267 (59) | 107 (71) | 108 (72) | 52 (35) |
| LAMA/LABA | 112 (25) | 24 (16) | 20 (13) | 68 (45) |
| LABA | 30 (7) | 11 (7) | 0 (0) | 19 (13) |
| LAMA | 222 (49) | 91 (60) | 65 (43) | 66 (44) |
| ICS | 0 (0) | 0 (0) | 0 (0) | 0 (0) |
| SABA | 0 (0) | 0 (0) | 0 (0) | 0 (0) |
| ICS/LAMA/LABA | 5 (1) | 1 (1) | 0 (0) | 4 (3) |
| **Time on maintenance treatment, years** |  |  |  |  |
| Median (IQR) | 3.00 (1.50–5.00) | 2.50 (1.00–5.00) | 3.00 (2.00–6.00) | 3.00 (2.00–5.00) |
| **Rescue medication, n (%)a** |  |  |  |  |
| Not receiving rescue  medication | 93 (21) | 15 (10) | 39 (26) | 39 (26) |
| Albuterol sulfate/albuterol sulfate HFA | 141 (31) | 3 (2) | 69 (46) | 69 (46) |
| Bricanyl | 4 (1) | 4 (3) | 0 | 0 |
| Budesonide/formoterol | 2 (0) | 0 | 1 (1) | 1 (1) |
| Fluticasone propionate | 2 (0) | 0 | 1 (1) | 1 (1) |
| Ipratropium bromide | 3 (1) | 1 (1) | 1 (1) | 1 (1) |
| Levosalbutamol | 4 (1) | 0 | 2 (1) | 2 (1) |
| Oxis Turbohaler | 1 (0) | 1 (1) | 0 | 0 |
| Salbutamol | 61 (14) | 61 (41) | 0 | 0 |
| Terbutaline | 2 (0) | 0 | 1 (1) | 1 (1) |
| Tiotropium bromide | 2 (0) | 0 | 1 (1) | 1 (1) |
| Umeclidinium bromide/vilanterol | 2 (0) | 0 | 1 (1) | 1 (1) |
| Ventolin HFA | 133 (30) | 65 (43) | 34 (23) | 34 (23) |
| **Time on rescue medication, years** |  |  |  |  |
| Median (IQR) | 4.00 (2.00–8.00) | 5.00 (2.00–9.00) | 4.00 (2.00–7.00) | 4.00 (2.00–7.00) |
| **Current monthly cost of COPD medicationb** |  |  |  |  |
| Median (IQR) | 18.0 (10.0–45.0) | N/A | 38.0 (15.0–80.0) | 10.0 (8.00–20.0) |

**Notes:** aIn some cases, both the brand name and the generic name were referenced to increase familiarity to patients and improve the accuracy of patient reporting. Patients were only able to select one option from this list, so could not report both the brand name and the generic name: data are mutually exclusive. bGermany: Euros; USA: US dollars.

**Abbreviations:** COPD, chronic obstructive pulmonary disease; DCE, discrete choice experiment; HFA, hydrofluoroalkane; ICS, inhaled corticosteroid; IQR, interquartile range; LABA, long-acting β2-agonist; LAMA, long-acting muscarinic antagonist; N/A, not applicable; SABA, short-acting β2-agonist; UK, United Kingdom; USA, United States of America.

**Table S7** Mixed-effects logit model (random effects for each attribute)

|  | **UK** | | | **USA** | | | **Germany** | | |
| --- | --- | --- | --- | --- | --- | --- | --- | --- | --- |
| **Coefficient of mean estimate** | **OR (95% CI)** | **p-value** | **Coefficient of mean estimate** | **OR (95% CI)** | **p-value** | **Coefficient of mean estimate** | **OR (95% CI)** | **p-value** |
| **Ease of usea** |  |  |  |  |  |  |  |  |  |
| No mistakes | 0.61 | 1.84 (1.53–2.21) | <0.0001 | 0.61 | 1.84 (1.55–2.18) | <0.0001 | 0.47 | 1.60 (1.34–1.92) | <0.0001 |
| Some mistakes | 0.54 | 1.71 (1.44–2.03) | <0.0001 | 0.50 | 1.65 (1.4–1.94) | <0.0001 | 0.43 | 1.53 (1.27–1.85) | <0.0001 |
| **Exacerbations (per one exacerbation decrease/year)** | 0.80 | 2.22 (1.98–2.50) | <0.0001 | 0.49 | 1.63 (1.5–1.78) | <0.0001 | 0.93 | 2.54 (2.26–2.85) | <0.0001 |
| **Times per day medication needed (per one decrease)** | 0.10 | 1.11 (1.01–1.22) | 0.0303 | 0.24 | 1.27 (1.17–1.39) | <0.0001 | 0.16 | 1.18 (1.07–1.29) | 0.0004 |
| **Number of inhalers (per one decrease)** | 0.26 | 1.30 (1.19–1.41) | <0.0001 | 0.39 | 1.48 (1.36–1.61) | <0.0001 | 0.20 | 1.22 (1.12–1.33) | <0.0001 |
| **Out-of-pocket costs (per 5% decreaseb)** | N/A | N/A | N/A | 0.20 | 1.22 (1.12–1.33) | <0.0001 | 0.20 | 1.22 (1.11–1.34) | <0.0001 |
| **Side effectsc** |  |  |  |  |  |  |  |  |  |
| No side effects | 2.46 | 11.65 (9.00–15.08) | <0.0001 | 1.97 | 7.17 (5.71–8.99) | <0.0001 | 2.44 | 11.45 (8.87–14.78) | <0.0001 |
| Some side effects | 1.52 | 4.59 (3.75–5.62) | <0.0001 | 1.22 | 3.40 (2.83–4.08) | <0.0001 | 1.29 | 3.64 (3.02–4.39) | <0.0001 |

**Notes:** aReference: a lot of mistakes; bCost reduction relative to cost of current medication (USA and Germany only); cReference: a lot of side effects.

**Abbreviations:** CI, confidence interval; N/A, not applicable; OR, odds ratio; UK, United Kingdom; USA, United States of America.

**Table S8** Preference heterogeneity per country for select clinical characteristics (final DCE)

|  | **UK (n=150)** | | **USA (n=150)** | | **Germany (n=150)** | |
| --- | --- | --- | --- | --- | --- | --- |
|  | **Estimate** | **p-value** | **Estimate** | **p-value** | **Estimate** | **p-value** |
| **Exacerbation history × exacerbationsa** | –0.1175 | 0.0002 | –0.025 | 0.3923 | –0.0908 | 0.0043 |
| **Type of inhaler (reference: DPI) × ease of use (reference: a lot of mistakes)** | | | | | | |
| pMDI × no mistakes | 1.3215 | 0.1338 | –0.2281 | 0.2175 | N/D | N/D |
| pMDI × some mistakes | 0.2432 | 0.7843 | 0.0866 | 0.6481 | N/D | N/D |
| SMI × no mistakes | –0.4762 | 0.4063 | N/D | N/D | 0.1279 | 0.5993 |
| SMI × some mistakes | 0.2016 | 0.7473 | N/D | N/D | 0.5590 | 0.0345 |
| DPI and pMDI × no mistakes | 0.1403 | 0.4184 | –0.0109 | 0.9768 | –0.2825 | 0.4748 |
| DPI and pMDI × some mistakes | 0.0561 | 0.7665 | –0.0458 | 0.9047 | 0.0659 | 0.8792 |
| DPI and SMI × no mistakes | 0.3668 | 0.0268 | –0.1689 | 0.3041 | –0.3153 | 0.0288 |
| DPI and SMI × some mistakes | –0.0170 | 0.9245 | –0.1102 | 0.5110 | –0.2548 | 0.1064 |
| DPI and SMI and pMDI × no mistakes | –0.1167 | 0.6493 | –0.5615 | 0.0111 | –0.6552 | 0.2345 |
| DPI and SMI and pMDI × some mistakes | 0.0262 | 0.9257 | –0.5010 | 0.0265 | –0.2663 | 0.6603 |
| **Current number of inhalers × number of inhalers** | –0.0765 | 0.0997 | 0.0203 | 0.7501 | –0.0202 | 0.6168 |
| **Age × ease of use (reference: a lot of mistakes)** | | | | | | |
| Age × no mistakes | –0.0109 | 0.1551 | –0.0045 | 0.5088 | –0.0096 | 0.2235 |
| Age × some mistakes | –0.0137 | 0.1009 | –0.0003 | 0.9682 | –0.0132 | 0.1275 |
| **Time since diagnosis × side effects (reference: a lot of side effects)** | | | | | | |
| Time since diagnosis × no side effects | 0.0166 | 0.4789 | –0.0002 | 0.9942 | –0.0028 | 0.9134 |
| Time since diagnosis × some side effects | 0.0208 | 0.3442 | 0.0047 | 0.8423 | –0.0043 | 0.8611 |

**Notes:** aFewer than two exacerbations in the next year.

**Abbreviations:** DCE, discrete choice experiment; DPI, dry-powder inhaler; N/D, no data; pMDI, pressurized metered dose inhaler; SMI, soft-mist inhaler; UK, United Kingdom; USA, United States of America.

**Figure S1** Example choice set.


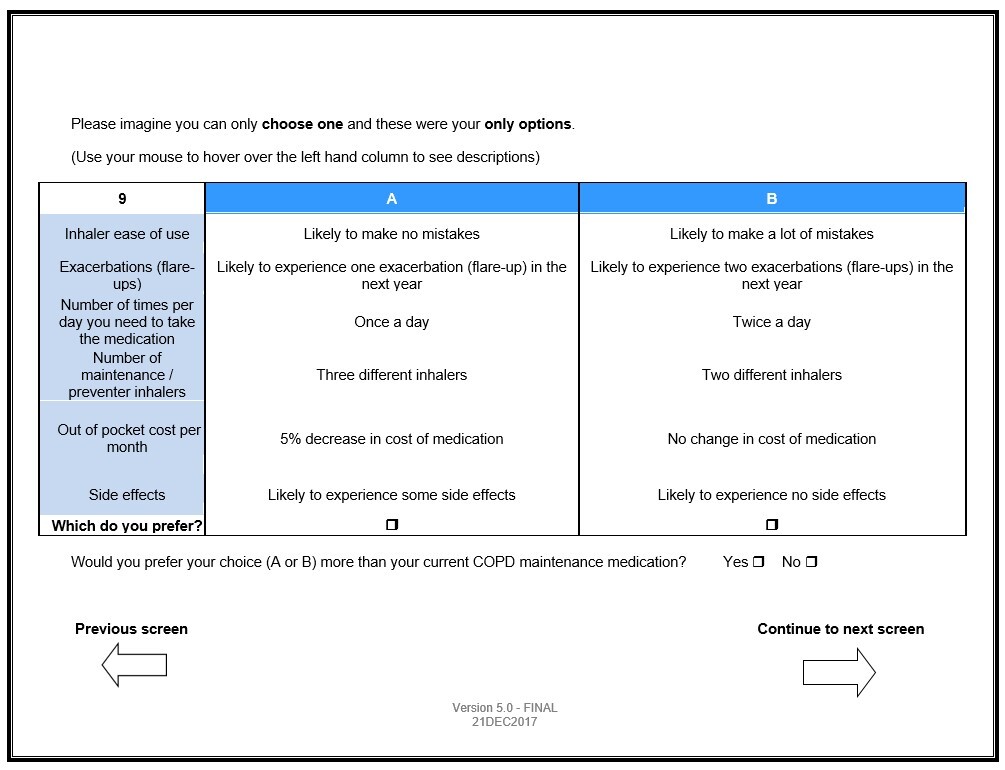


# References

1. Stolz D, Kostikas K, Blasi F, et al. Combined assessment according to the new GOLD guidelines and its relation to outcome in COPD. European Respiratory Society International Congress 2012; 2012; Vienna, Austria.

2. McFadden D. *Conditional logit analysis of qualitative choice be. In: Frontiers in econometrics.* New York: Academic Press; 1973.

3. Hauber AB, González JM, Groothuis-Oudshoorn CG, et al. Statistical methods for the analysis of discrete choice experiments: a report of the ISPOR Conjoint Analysis Good Research Practices Task Force. *Value Health.* 2016;19(4):300–315.

4. ChoiceMetrics. NGene: user manual and reference guide. 2018; Available from: <http://www.choice-metrics.com/NgeneManual120.pdf>. Accessed 31 May, 2019.
